# Supplementary material for: Zebrafish Model to Study Angiotensin II-Mediated Pathophysiology
Source: MDPI journal article supplement (doi:10.3390/biology10111177), 2021-11-13
Supplement: s1 [file s1]

**Table S1: List of primers used for quantitative RT-PCR analyses.**

| No. | gene name       | Accession Number   | Forward Primer                 | Reverse Primer                  |
|-----|-----------------|--------------------|--------------------------------|---------------------------------|
| 1   | <i>fn1a</i>     | ENSDARG00000019815 | <b>GGTCATCGTCCAGTCCAG</b>      | <b>ATCCACTGAATATGGGTGTT</b>     |
| 2   | <i>fn1b</i>     | ENSDARG00000006526 | <b>TGGAAATGTGATGCTATTGA</b>    | <b>GGCCAATCTGGTAGAACACC</b>     |
| 3   | <i>spp1</i>     | ENSDARG00000044276 | <b>AAGAAGACGTCTGCCTATGAT</b>   | <b>CGCTCATTTGCCTCGAT</b>        |
| 4   | <i>tnc</i>      | ENSDARG00000021948 | <b>AATGTGTGTGTAACATCGGGTT</b>  | <b>ATCACATATGCACATTCCATT</b>    |
| 5   | <i>ccn2a</i>    | ENSDARG00000042934 | <b>GGTGTACCGCAGTGGAGAGT</b>    | <b>CTACAGCACCGTCCAGACAC</b>     |
| 6   | <i>loxa</i>     | ENSDARG00000003259 | <b>TGAAAGAGCGCAACTTAGCCC</b>   | <b>CGTGCGCAAATGCGTAAATG</b>     |
| 7   | <i>colla1a</i>  | ENSDARG00000012405 | <b>TATTGGTGGTCAGCGTGGTA</b>    | <b>TCCTGGAGTACCCTCACGAC</b>     |
| 8   | <i>colla2</i>   | ENSDARG00000020007 | <b>CTGGCATGAAGGGACACAG</b>     | <b>GGGGTTCCATTTGATCCAG</b>      |
| 9   | <i>colla1b</i>  | ENSDARG00000035809 | <b>GAGGCTACAGAGCCGATGAC</b>    | <b>CATTCTGGGTGGCACATCCT</b>     |
| 10  | <i>coll3a1</i>  | ENSDARG00000045453 | <b>TTAGCTGCACGTCTACCGAAG</b>   | <b>CCCCAGGTTTCCCTTTAAGC</b>     |
| 11  | <i>col8a1b</i>  | ENSDARG00000003533 | <b>AGCCCCGAACCAAATTTCTG</b>    | <b>CCCCCGCATGGATATGATGT</b>     |
| 12  | <i>col2a1b</i>  | ENSDARG00000011407 | <b>ACGGATGCAAGAAACACACAGGA</b> | <b>TCCACAGGGGCAATGTCCACAA</b>   |
| 13  | <i>coll2a1b</i> | ENSDARG00000019601 | <b>GTGGCTCTCTTTACACTCGC</b>    | <b>AAACTTGACAGCGGTTGCTTCCAT</b> |
| 14  | <i>coll5a1b</i> | ENSDARG00000061848 | <b>GCGCTTCATGTCATGGAAGA</b>    | <b>TAGCCCGTGATGAAGGACAC</b>     |
| 15  | <i>myh6</i>     | ENSDARG00000090637 | <b>GCAACATGGAGGGCGAGATA</b>    | <b>CACTTTGCATTACCGCCTC</b>      |
| 16  | <i>myh7ba</i>   | ENSDARG00000076075 | <b>AAGCAGACACTGACCGGAAG</b>    | <b>CGTGGCTTGCATGGACTCTA</b>     |
| 17  | <i>myh7bb</i>   | ENSDARG00000035322 | <b>AAGAGACAAGCTGAGGACGC</b>    | <b>CCACGACCTTGACGACATGA</b>     |
| 18  | <i>nppa</i>     | ENSDARG00000052960 | <b>ATCCTGGGACAGAGACCGAG</b>    | <b>CCTATGCGATCCAGCCTTCC</b>     |
| 20  | <i>igf</i>      | ENSDARG00000094132 | <b>AGAAGGTCACACAACCGTGG</b>    | <b>CAGGAAGAGTGGCTATGCCC</b>     |

**Table S2: Mean ct values of quantitative RT-PCR analyses.**

**Supplementary Table 2A: Mean of ct values used for gene expression analyses respective to Figure 1H.**

|       | <i>igf</i> | <i>efla</i> |
|-------|------------|-------------|
| PBS   | 35.59      | 18.53       |
| AngII | 34.78      | 15.95       |

**Supplementary Table 2B: Mean of ct values used for gene expression analyses respective to Figure 2D.**

|       | <i>fn1a</i> | <i>fn1b</i> | <i>spp1</i> | <i>tnc</i> | <i>ccn2a</i> | <i>colla1a</i> | <i>colla2</i> | <i>colla1b</i> | <i>coll3a1</i> | <i>col8a1b</i> | <i>efla</i> |
|-------|-------------|-------------|-------------|------------|--------------|----------------|---------------|----------------|----------------|----------------|-------------|
| PBS   | 31.01       | 26.94       | 32.74       | 27.63      | 25.80        | 24.26          | 26.30         | 24.91          | 34.36          | 32.79          | 19.19       |
| AngII | 25.90       | 23.79       | 31.05       | 24.54      | 22.52        | 20.53          | 22.01         | 21.82          | 30.93          | 30.67          | 16.84       |

|       | <i>loxa</i> | <i>col2a1b</i> | <i>col12a1b</i> | <i>col15a1b</i> | <i>efla</i> |
|-------|-------------|----------------|-----------------|-----------------|-------------|
| PBS   | 31.465      | 29.33          | 29.41           | 34.33           | 18.40       |
| AngII | 27.9        | 26.63          | 29.27           | 31.31           | 16.02       |

**Supplementary Table 2C: Mean of ct values used for gene expression analyses respective to Figure 3C.**

|       | <i>nppa</i> | <i>myh6</i> | <i>myh7ba</i> | <i>myh7bb</i> | <i>efla</i> |
|-------|-------------|-------------|---------------|---------------|-------------|
| PBS   | 21.78       | 27.97       | 26.52         | 24.80         | 19.19       |
| AngII | 18.31       | 24.64       | 23.09         | 21.90         | 16.84       |

**Table S3: Gene expression fold changes analyzed by delta-Ct method.**

| SL# | Gene Name       | Fold changes |         |         |         |         |         |
|-----|-----------------|--------------|---------|---------|---------|---------|---------|
|     |                 | PBS-Control  |         |         | AngII   |         |         |
|     |                 | Sample1      | Sample2 | Sample3 | Sample1 | Sample2 | Sample3 |
| 1   | <i>igf</i>      | 1.024        | 0.988   | 0.986   | 0.233   | 0.587   | 0.181   |
| 2   | <i>fn1a</i>     | 0.993        | 1.011   | 0.994   | 5.703   | 8.931   | 6.093   |
| 3   | <i>fn1b</i>     | 0.995        | 1.011   | 0.993   | 1.660   | 1.815   | 1.744   |
| 4   | <i>spp1</i>     | 1.017        | 0.987   | 0.994   | 0.938   | 0.669   | 0.398   |
| 5   | <i>tnc</i>      | 1.065        | 0.837   | 1.097   | 1.469   | 2.155   | 1.454   |
| 6   | <i>ccn2a</i>    | 1.005        | 1.003   | 0.990   | 1.115   | 2.144   | 2.195   |
| 7   | <i>loxa</i>     | 0.996        | 0.999   | 1.004   | 1.884   | 2.465   | 2.520   |
| 8   | <i>coll1a</i>   | 1.007        | 0.991   | 1.001   | 2.308   | 2.697   | 2.827   |
| 9   | <i>colla2</i>   | 0.989        | 1.014   | 0.996   | 3.264   | 4.610   | 3.756   |
| 10  | <i>coll1b</i>   | 0.882        | 1.063   | 1.054   | 1.323   | 1.867   | 1.857   |
| 11  | <i>coll3a1</i>  | 0.991        | 0.988   | 1.019   | 1.552   | 3.079   | 1.940   |
| 12  | <i>col8a1a</i>  | 0.978        | 1.022   | 0.998   | 0.556   | 0.908   | 1.088   |
| 13  | <i>col2a1b</i>  | 1.003        | 1.004   | 0.991   | 1.231   | 1.071   | 1.465   |
| 14  | <i>coll2a1b</i> | 1.017        | 1.005   | 0.976   | 0.326   | 0.188   | 0.152   |
| 15  | <i>coll5a1b</i> | 1.008        | 1.011   | 0.980   | 1.203   | 1.540   | 2.023   |
| 16  | <i>myh6</i>     | 0.985        | 1.026   | 0.987   | 1.832   | 2.048   | 2.030   |
| 17  | <i>myh7ba</i>   | 1.009        | 1.005   | 0.984   | 2.017   | 2.115   | 2.126   |
| 18  | <i>myh7bb</i>   | 1.003        | 1.009   | 0.987   | 1.215   | 1.731   | 1.272   |
| 19  | <i>nppa</i>     | 1.009        | 0.973   | 1.016   | 2.039   | 1.893   | 2.110   |
